# Supplementary material for: Japanese value set for the EORTC QLU-C10D: A multi-attribute utility instrument based on the EORTC QLQ-C30 cancer-specific quality-of-life questionnaire
Source: Springer Nature journal article supplement (doi:10.1007/s11136-024-03655-7), 2024-05-09
Supplement: MOESM3 [file 27074814]

## **Japanese value set for the EORTC QLU-C10D: A multi-attribute utility instrument based on cancer-specific quality-of-life instrument.**

Quality of Life Research

\*Shiroiwa T<sup>1</sup>, King MT<sup>2,3</sup>, Norman R<sup>4</sup>, Müller F<sup>5,6</sup>, Campbell R<sup>2</sup>, Kemmler G<sup>3,7</sup>, Murata T<sup>8</sup>, Shimozuma K<sup>9</sup>, Fukuda T<sup>1</sup>

1. Center for Outcomes Research and Economic Evaluation for Health (C2H), National Institute of Public Health, Wako, Saitama, Japan
2. University of Sydney, Faculty of Science, School of Psychology, Sydney NSW, Australia
3. European Organisation for Research and Treatment of Cancer Quality of Life Group
4. School of Population Health, Curtin University, Perth, WA, Australia
5. Amsterdam UMC location University of Amsterdam, Medical Psychology, Meibergdreef 9, Amsterdam, Netherlands;
6. Amsterdam Public Health, Global Health, Amsterdam, Netherlands
7. Department of Psychiatry, Psychotherapy and Psychosomatics I, Medical University of Innsbruck, Innsbruck, Austria
8. Crecon Medical Assessment Co., Ltd., Tokyo, Japan
9. College of Life Sciences, Ritsumeikan University, Kusatsu, Japan

\*Corresponding author:

Takeru Shiroiwa

Email: [t.shiroiwa@icer.jp](mailto:t.shiroiwa@icer.jp)

### Online resource 3 Respondent perceptions of DCE valuation task

*Survey question: Did you find the questions on these 16 screens easier or harder than most surveys you do?*

| Response       | Frequency   | Percent     |
|----------------|-------------|-------------|
| Easier         | 139         | 5.7%        |
| About the same | 585         | 24.1%       |
| Harder         | 1543        | 63.7%       |
| I couldn't say | 157         | 6.5%        |
| <b>Total</b>   | <b>2424</b> | <b>100%</b> |

*Survey question: How clear was the presentation of the health states?*

| Response                  | Frequency   | Percent     |
|---------------------------|-------------|-------------|
| Very unclear              | 166         | 6.8%        |
| Unclear                   | 908         | 37.5%       |
| Neither clear nor unclear | 793         | 32.7%       |
| Clear                     | 511         | 21.1%       |
| Very clear                | 46          | 1.9%        |
| <b>Total</b>              | <b>2424</b> | <b>100%</b> |

*Survey question: How difficult was it to choose between the pairs of health states on each screen?*

| Response                   | Frequency   | Percent     |
|----------------------------|-------------|-------------|
| Very difficult             | 331         | 13.7        |
| Difficult                  | 1324        | 54.6        |
| Neither easy nor difficult | 590         | 24.3        |
| Easy                       | 151         | 6.2         |
| Very easy                  | 28          | 1.2         |
| <b>Total</b>               | <b>2424</b> | <b>100%</b> |

*Survey question: Did you have a strategy for choosing between the pairs of health states on each screen?*

| Response                                                 | Frequency   | Percent     |
|----------------------------------------------------------|-------------|-------------|
| I did not have a strategy                                | 188         | 7.8%        |
| I focused on just a few aspects of the health states     | 622         | 25.7%       |
| I focused on the aspects that were highlighted in yellow | 770         | 31.8%       |
| I considered most of the aspects                         | 635         | 26.2%       |
| I considered all of the aspects                          | 186         | 7.7%        |
| Other                                                    | 23          | 0.9%        |
| <b>Total</b>                                             | <b>2424</b> | <b>100.</b> |

All participants, including those who selected the response ‘Other’ could enter free text to describe the strategy they used; 103 participants provided usable data, as summarized in the table below.

Length of survival time was considered by the majority of these participants (n=65/103, 51%) when choosing between the health states. Acceptability of burden to themselves was cited by 22/103 (17%), burden to others was cited by 18/103 (14%). Pain, appetite and sleep with cited by 8, 4 and 4 people, respectively.

| <b>Coding of free text describing choice strategy</b> | <b>Frequency</b> | <b>Percent</b> |
|-------------------------------------------------------|------------------|----------------|
| Length of survival                                    | 65               | 51%            |
| Acceptability of burden to themselves                 | 22               | 17%            |
| Burden to others                                      | 18               | 14%            |
| Pain                                                  | 8                | 6%             |
| Appetite                                              | 4                | 3%             |
| Sleep                                                 | 4                | 3%             |
| Priority of each attribute for themselves             | 2                | 2%             |
| Corresponding factor to their own experience          | 1                | 1%             |
| Other than their own experience                       | 1                | 1%             |
| Walk ability                                          | 1                | 1%             |
| <b>Total</b>                                          | <b>103</b>       |                |
