# Supplementary material for: Japanese value set for the EORTC QLU-C10D: A multi-attribute utility instrument based on the EORTC QLQ-C30 cancer-specific quality-of-life questionnaire
Source: Springer Nature journal article supplement (doi:10.1007/s11136-024-03655-7), 2024-05-09
Supplement: MOESM5 [file 27074814]

**Japanese value set for the EORTC QLU-C10D: A multi-attribute utility instrument based on cancer-specific quality-of-life instrument.**

Quality of Life Research

\*Shiroiwa T<sup>1</sup>, King MT<sup>2,3</sup>, Norman R<sup>4</sup>, Müller F<sup>5,6</sup>, Campbell R<sup>2</sup>, Kemmler G<sup>3,7</sup>, Murata T<sup>8</sup>, Shimozuma K<sup>9</sup>, Fukuda T<sup>1</sup>

1. Center for Outcomes Research and Economic Evaluation for Health (C2H), National Institute of Public Health, Wako, Saitama, Japan
2. University of Sydney, Faculty of Science, School of Psychology, Sydney NSW, Australia
3. European Organisation for Research and Treatment of Cancer Quality of Life Group
4. School of Population Health, Curtin University, Perth, WA, Australia
5. Amsterdam UMC location University of Amsterdam, Medical Psychology, Meibergdreef 9, Amsterdam, Netherlands;
6. Amsterdam Public Health, Global Health, Amsterdam, Netherlands
7. Department of Psychiatry, Psychotherapy and Psychosomatics I, Medical University of Innsbruck, Innsbruck, Austria
8. Crecon Medical Assessment Co., Ltd., Tokyo, Japan
9. College of Life Sciences, Ritsumeikan University, Kusatsu, Japan

\*Corresponding author:

Takeru Shiroiwa

Email: [t.shiroiwa@icer.jp](mailto:t.shiroiwa@icer.jp)

**Online Resource 5** Conditional logit results for Model 1 (unconstrained) and Model 2 (monotonicity imposed), unweighted and weighted analyses (estimated coefficients and robust standard errors (SE)), based on data from respondents who completed the entire survey (i.e. all 16 choice sets and all demographic questions, n=2312)

| Coefficient <sup>a</sup> (SE)        |                | Unweighted Analysis | Weighted Analyses <sup>b</sup> |                     |
|--------------------------------------|----------------|---------------------|--------------------------------|---------------------|
| Dimension                            | Level          | Unconstrained       | Unconstrained                  | Ordered             |
| Duration                             | Linear (years) | 0.4948 (0.0202)***  | 0.4703 (0.0359)***             | 0.4732 (0.0355)***  |
| Duration x Physical Functioning      | Level 2        | -0.0519 (0.0071)*** | -0.0461 (0.0105)***            | -0.0463 (0.0105)*** |
|                                      | Level 3        | -0.0781 (0.0077)*** | -0.0620 (0.0105)***            | -0.0621 (0.0105)*** |
|                                      | Level 4        | -0.1321 (0.0073)*** | -0.1250 (0.0104)***            | -0.1249 (0.0104)*** |
| Duration x Role Functioning          | Level 2        | -0.0211 (0.0057)*** | -0.0207 (0.0082)*              | -0.0199 (0.0082)*   |
|                                      | Level 3        | -0.0635 (0.0061)*** | -0.0614 (0.0083)***            | -0.0609 (0.0084)*** |
|                                      | Level 4        | -0.0801 (0.0057)*** | -0.0755 (0.0073)***            | -0.0749 (0.0073)*** |
| Duration x Social Functioning        | Level 2        | -0.0120 (0.0056)*   | -0.0041 (0.0082)               | -0.0043 (0.0082)    |
|                                      | Level 3        | -0.0437 (0.0061)*** | -0.0416 (0.0091)***            | -0.0425 (0.0090)*** |
|                                      | Level 4        | -0.0582 (0.0056)*** | -0.0581 (0.0089)***            | -0.0582 (0.0089)*** |
| Duration x Emotional Functioning     | Level 2        | -0.0116 (0.0055)*   | -0.0057 (0.0075)               | -0.0064 (0.0076)    |
|                                      | Level 3        | -0.0156 (0.006)**   | -0.0058 (0.0084)               | -0.0071 (0.0083)    |
|                                      | Level 4        | -0.0358 (0.0053)*** | -0.0370 (0.0077)***            | -0.0372 (0.0076)*** |
| Duration x Pain                      | Level 2        | -0.0120 (0.0057)*   | -0.0079 (0.0084)               | -0.0086 (0.0084)    |
|                                      | Level 3        | -0.0586 (0.006)***  | -0.0554 (0.0092)***            | -0.0570 (0.0090)*** |
|                                      | Level 4        | -0.0855 (0.0054)*** | -0.0762 (0.0087)***            | -0.0767 (0.0086)*** |
| Duration x Fatigue                   | Level 2        | -0.0154 (0.0053)**  | -0.0248 (0.0084)**             | -0.0252 (0.0084)**  |
|                                      | Level 3        | -0.0378 (0.0056)*** | -0.0333 (0.0089)***            | -0.0345 (0.0087)*** |
|                                      | Level 4        | -0.0419 (0.0052)*** | -0.0364 (0.0078)***            | -0.0371 (0.0077)*** |
| Duration x Trouble Sleeping          | Level 2        | -0.0288 (0.0052)*** | -0.0308 (0.0071)***            | -0.0263 (0.0069)*** |
|                                      | Level 3        | -0.0281 (0.0058)*** | -0.0192 (0.0091)*              | -0.0292 (0.0072)*** |
|                                      | Level 4        | -0.0362 (0.0052)*** | -0.0270 (0.0074)***            | -0.0090 (0.0070)    |
| Duration x Appetite                  | Level 2        | -0.0088 (0.0052)    | -0.0090 (0.0070)               | -0.0329 (0.0074)*** |
|                                      | Level 3        | -0.0330 (0.0056)*** | -0.0325 (0.0075)***            | -0.0381 (0.0076)*** |
|                                      | Level 4        | -0.0394 (0.0052)*** | -0.0379 (0.0076)***            | -0.0162 (0.0076)*   |
| Duration x Nausea                    | Level 2        | -0.0264 (0.0054)*** | -0.0166 (0.0075)*              | -0.0453 (0.0083)*** |
|                                      | Level 3        | -0.0506 (0.0058)*** | -0.0453 (0.0083)***            | -0.0583 (0.0083)*** |
|                                      | Level 4        | -0.0621 (0.0052)*** | -0.0581 (0.0083)***            | -0.0218 (0.0086)*   |
| Duration x Bowel Problems            | Level 2        | -0.0117 (0.0053)*   | -0.0218 (0.0086)*              | -0.0332 (0.0095)*** |
|                                      | Level 3        | -0.0218 (0.0058)*** | -0.0334 (0.0095)***            | -0.0445 (0.0082)*** |
|                                      | Level 4        | -0.0377 (0.0051)*** | -0.0446 (0.0082)***            | 0.4732 (0.0355)***  |
| Pseudo R <sup>2</sup>                |                | 0.1198              | 0.1177                         | 0.1176              |
| Log Pseudo-likelihood                |                | -22179              | -26073                         | -26076              |
| Akaike information criterion (AIC)   |                | 44420               | 52207                          | 52212               |
| Bayesian information criterion (BIC) |                | 44705               | 52492                          | 52488               |

a. The coefficient for each level of each QOL domain was estimated as the interaction of that level with duration. Levels combined to ensure monotonicity within each dimension are noted in italics  
Levels of statistical significance: \*\*\*0.1%; \*\*1%; \*5%.

b. Analyses were weighted for four variables simultaneously using raking: income, education, health status (EQ-5D), mental health (Kessler 6).
